# Supplementary material
Source: PubMed Central journal article supplement (PMC5905678)
Supplement: NIHMS956494-supplement-supplemental_results.pdf [file NIHMS956494-supplement-supplemental_results.pdf]

# Trends in Selected Measures of Racial and Ethnic Disparities in Gonorrhea and Syphilis in the United States, 1981 - 2013

## Supplemental Appendix of Additional Results

Harrell W. Chesson, PhD

Chirag G. Patel, DC, MPH

Thomas L. Gift, PhD

Sevgi O. Aral, PhD

Division of STD Prevention, Centers for Disease Control and Prevention, Atlanta, GA

The findings and conclusions in this report are those of the authors and do not necessarily represent the official position of the Centers for Disease Control and Prevention.

Revised September 6, 2016

## Summary of additional analyses

A. In the main analyses, we excluded cases with missing race information or cases listed as “other.” Here, we report the results of additional analyses in which we examined the potential influence of omitting these cases. We repeated the base case analysis five times, each time examining an extreme scenario in which all STD cases in the race/ethnicity category “other” or “unknown” were assumed to occur in exactly one of the five racial/ethnic groups. We also examined three additional scenarios in which we assigned 25%, 50%, or 75% of the cases, rather than all cases, to exactly one of the five groups. See Appendix Table A, Part 1 and Part 2.

B. In the main analyses, we examined agreement among the disparity measures as to whether there was an increase or decrease in disparity, without any threshold specified for what “counted” as an increase or decrease. To account for the magnitude of the change, we have added a sensitivity analyses in which we apply minimum percentage change thresholds of 1%, 3%, and 5%. That is, we repeated the analysis 3 times, focusing on situations in which the change in the disparity measure was at least  $\pm 1\%$ ,  $\pm 3\%$ , and  $\pm 5\%$ . When we limit the comparison between any two disparity measures to periods in which both disparity measures agree that the change exceeds the given threshold, the degree of correlation generally increased. See Appendix Table B, Parts 1-3.

C. In the manuscript, we summarize the results in Table 1 by showing values of STD rates and the disparity measures for the first year (1981), the final year (2013), and an intermediate year (1993). We used 1993 as the intermediate year because this was the approximate inflection point in which the disparity measures generally changed from increasing to decreasing (see Figure 2A and 2B). However, because the choice of 1993 as the comparison year was arbitrary, we present two alternate versions of Table 1 in which we use 1990 (a peak syphilis year) and 1997 (the midpoint of the time frame we analyzed) as comparison years. See Appendix Table C, Part 1 and Part 2.

D. In the main analyses, we focused on overall rates, rather than age-adjusted rates. We performed sensitivity analyses in which we examined racial/ethnic disparities in STD rates among ages 15 to 39 years. See Appendix Table D, Part 1 and Part 2.

E. In the main analyses, we examined racial/ethnic disparities in reported STD rates from 1981 to 2013. For syphilis, the percentage of reported cases with missing race/ethnicity was notably higher from 1983 to 1985 than in the remaining years of the analysis, as described in the manuscript. As a sensitivity analysis, we repeated the main analyses using only data from 1986 to 2013. See Appendix Table E.

**Appendix Table A. Number of years all five measures agree, exactly four measures agree, and exactly three measures agree on the direction of the change in disparity when assigning 25%, 50%, 75%, or 100% of the “other” cases and cases with missing race/ethnicity data to one of the five racial/ethnic groups**

**Part I: Annual changes in syphilis and gonorrhea**

|                                                  | Annual change in syphilis |                 |                 | Annual change in gonorrhea |                 |                 |
|--------------------------------------------------|---------------------------|-----------------|-----------------|----------------------------|-----------------|-----------------|
|                                                  | All 5 agree               | Exactly 4 agree | Exactly 3 agree | All 5 agree                | Exactly 4 agree | Exactly 3 agree |
| Base case                                        | 18                        | 11              | 3               | 19                         | 10              | 3               |
| Whites assigned 25% of unknown/missing cases     | 19                        | 11              | 2               | 18                         | 12              | 2               |
| Whites assigned 50% of unknown/missing cases     | 20                        | 10              | 2               | 18                         | 13              | 1               |
| Whites assigned 75% of unknown/missing cases     | 20                        | 10              | 2               | 19                         | 12              | 1               |
| Whites assigned 100% of unknown/missing cases    | 19                        | 12              | 1               | 15                         | 14              | 3               |
| Blacks assigned 25% of unknown/missing cases     | 18                        | 11              | 3               | 18                         | 11              | 3               |
| Blacks assigned 50% of unknown/missing cases     | 18                        | 11              | 3               | 21                         | 9               | 2               |
| Blacks assigned 75% of unknown/missing cases     | 18                        | 12              | 2               | 21                         | 9               | 2               |
| Blacks assigned 100% of unknown/missing cases    | 17                        | 12              | 3               | 21                         | 10              | 1               |
| Hispanics assigned 25% of unknown/missing cases  | 18                        | 11              | 3               | 18                         | 12              | 2               |
| Hispanics assigned 50% of unknown/missing cases  | 18                        | 11              | 3               | 22                         | 7               | 3               |
| Hispanics assigned 75% of unknown/missing cases  | 17                        | 12              | 3               | 20                         | 8               | 4               |
| Hispanics assigned 100% of unknown/missing cases | 17                        | 11              | 4               | 19                         | 10              | 3               |
| A/PIs assigned 25% of unknown/missing cases      | 27                        | 3               | 2               | 24                         | 6               | 2               |
| A/PIs assigned 50% of unknown/missing cases      | 27                        | 3               | 2               | 24                         | 7               | 1               |
| A/PIs assigned 75% of unknown/missing cases      | 25                        | 4               | 3               | 23                         | 8               | 1               |
| A/PIs assigned 100% of unknown/missing cases     | 24                        | 5               | 3               | 23                         | 8               | 1               |
| AI/ANs assigned 25% of unknown/missing cases     | 13                        | 16              | 3               | 16                         | 11              | 5               |
| AI/ANs assigned 50% of unknown/missing cases     | 8                         | 19              | 5               | 18                         | 9               | 5               |
| AI/ANs assigned 75% of unknown/missing cases     | 7                         | 19              | 6               | 18                         | 9               | 5               |
| AI/ANs assigned 100% of unknown/missing cases    | 7                         | 19              | 6               | 18                         | 8               | 6               |

**Appendix Table A, Part 2: 5-year changes in syphilis and gonorrhea**

|                                                  | 5-year change in syphilis |                 |                 | 5-year change in gonorrhea |                 |                 |
|--------------------------------------------------|---------------------------|-----------------|-----------------|----------------------------|-----------------|-----------------|
|                                                  | All 5 agree               | Exactly 4 agree | Exactly 3 agree | All 5 agree                | Exactly 4 agree | Exactly 3 agree |
| Base case                                        | 23                        | 5               | 0               | 20                         | 7               | 1               |
| Whites assigned 25% of unknown/missing cases     | 23                        | 5               | 0               | 20                         | 8               | 0               |
| Whites assigned 50% of unknown/missing cases     | 23                        | 5               | 0               | 20                         | 8               | 0               |
| Whites assigned 75% of unknown/missing cases     | 23                        | 5               | 0               | 21                         | 6               | 1               |
| Whites assigned 100% of unknown/missing cases    | 23                        | 5               | 0               | 22                         | 5               | 1               |
| Blacks assigned 25% of unknown/missing cases     | 23                        | 5               | 0               | 21                         | 6               | 1               |
| Blacks assigned 50% of unknown/missing cases     | 23                        | 5               | 0               | 20                         | 8               | 0               |
| Blacks assigned 75% of unknown/missing cases     | 24                        | 4               | 0               | 20                         | 7               | 1               |
| Blacks assigned 100% of unknown/missing cases    | 24                        | 4               | 0               | 19                         | 8               | 1               |
| Hispanics assigned 25% of unknown/missing cases  | 23                        | 5               | 0               | 18                         | 9               | 1               |
| Hispanics assigned 50% of unknown/missing cases  | 24                        | 4               | 0               | 19                         | 6               | 3               |
| Hispanics assigned 75% of unknown/missing cases  | 24                        | 4               | 0               | 19                         | 5               | 4               |
| Hispanics assigned 100% of unknown/missing cases | 24                        | 4               | 0               | 19                         | 5               | 4               |
| A/PIs assigned 25% of unknown/missing cases      | 27                        | 0               | 1               | 26                         | 0               | 2               |
| A/PIs assigned 50% of unknown/missing cases      | 27                        | 0               | 1               | 24                         | 2               | 2               |
| A/PIs assigned 75% of unknown/missing cases      | 24                        | 3               | 1               | 22                         | 4               | 2               |
| A/PIs assigned 100% of unknown/missing cases     | 24                        | 3               | 1               | 18                         | 8               | 2               |
| AI/ANs assigned 25% of unknown/missing cases     | 14                        | 14              | 0               | 14                         | 12              | 2               |
| AI/ANs assigned 50% of unknown/missing cases     | 12                        | 14              | 2               | 11                         | 14              | 3               |
| AI/ANs assigned 75% of unknown/missing cases     | 10                        | 16              | 2               | 11                         | 12              | 5               |
| AI/ANs assigned 100% of unknown/missing cases    | 9                         | 16              | 3               | 11                         | 12              | 5               |

**Appendix Table B: Correlation between changes in racial disparity measures, 1981 – 2013: Pearson correlation coefficient (p-value)**

**Part 1: Analysis limited to changes of at least  $\pm 1\%$**

| Disparity measure                    | Gini coefficient | Index of disparity,<br>not weighted | Index of disparity,<br>weighted | Black-to-white rate ratio |
|--------------------------------------|------------------|-------------------------------------|---------------------------------|---------------------------|
| Panel A: Annual changes in syphilis  |                  |                                     |                                 |                           |
| Index of disparity, not weighted     | 0.949 (<0.0001)  | 1                                   |                                 |                           |
| Index of disparity, weighted         | 0.993 (<0.0001)  | 0.951 (<0.0001)                     | 1                               |                           |
| Black-to-white rate ratio            | 0.906 (<0.0001)  | 0.870 (<0.0001)                     | 0.909 (<0.0001)                 | 1                         |
| Population attributable proportion   | 0.745 (<0.0001)  | 0.683 (0.0001)                      | 0.689 (<0.0001)                 | 0.628 (0.0004)            |
| Panel B: 5-year changes in syphilis  |                  |                                     |                                 |                           |
| Index of disparity, not weighted     | 0.990 (<0.0001)  | 1                                   |                                 |                           |
| Index of disparity, weighted         | 0.997 (<0.0001)  | 0.992 (<0.0001)                     | 1                               |                           |
| Black-to-white rate ratio            | 0.863 (<0.0001)  | 0.861 (<0.0001)                     | 0.858 (<0.0001)                 | 1                         |
| Population attributable proportion   | 0.970 (<0.0001)  | 0.954 (<0.0001)                     | 0.957 (<0.0001)                 | 0.788 (<0.0001)           |
| Panel C: Annual changes in gonorrhea |                  |                                     |                                 |                           |
| Index of disparity, not weighted     | 0.942 (<0.0001)  | 1                                   |                                 |                           |
| Index of disparity, weighted         | 0.991 (<0.0001)  | 0.955 (<0.0001)                     | 1                               |                           |
| Black-to-white rate ratio            | 0.971 (<0.0001)  | 0.943 (<0.0001)                     | 0.971 (<0.0001)                 | 1                         |
| Population attributable proportion   | 0.497 (0.0359)   | 0.492 (0.0529)                      | 0.576 (0.0194)                  | 0.394 (0.0947)            |
| Panel D: 5-year changes in gonorrhea |                  |                                     |                                 |                           |
| Index of disparity, not weighted     | 0.934 (<0.0001)  | 1                                   |                                 |                           |
| Index of disparity, weighted         | 0.995 (<0.0001)  | 0.960 (<0.0001)                     | 1                               |                           |
| Black-to-white rate ratio            | 0.982 (<0.0001)  | 0.971 (<0.0001)                     | 0.990 (<0.0001)                 | 1                         |
| Population attributable proportion   | 0.696 (0.0002)   | 0.698 (0.0002)                      | 0.739 (<0.0001)                 | 0.699 (0.0001)            |

**Appendix Table B, Part 2: Analysis limited to changes of at least  $\pm 3\%$** 

| Disparity measure                    | Gini coefficient | Index of disparity,<br>not weighted | Index of disparity,<br>weighted | Black-to-white rate ratio |
|--------------------------------------|------------------|-------------------------------------|---------------------------------|---------------------------|
| Panel A: Annual changes in syphilis  |                  |                                     |                                 |                           |
| Index of disparity, not weighted     | 0.953 (<0.0001)  | 1                                   |                                 |                           |
| Index of disparity, weighted         | 0.995 (<0.0001)  | 0.951 (<0.0001)                     | 1                               |                           |
| Black-to-white rate ratio            | 0.914 (<0.0001)  | 0.873 (<0.0001)                     | 0.918 (<0.0001)                 | 1                         |
| Population attributable proportion   | 0.778 (0.0001)   | 0.738 (0.0005)                      | 0.765 (0.0003)                  | 0.680 (0.0014)            |
| Panel B: 5-year changes in syphilis  |                  |                                     |                                 |                           |
| Index of disparity, not weighted     | 0.991 (<0.0001)  | 1                                   |                                 |                           |
| Index of disparity, weighted         | 0.997 (<0.0001)  | 0.992 (<0.0001)                     | 1                               |                           |
| Black-to-white rate ratio            | 0.864 (<0.0001)  | 0.861 (<0.0001)                     | 0.858 (<0.0001)                 | 1                         |
| Population attributable proportion   | 0.971 (<0.0001)  | 0.955 (<0.0001)                     | 0.959 (<0.0001)                 | 0.791 (<0.0001)           |
| Panel C: Annual changes in gonorrhea |                  |                                     |                                 |                           |
| Index of disparity, not weighted     | 0.963 (0.0001)   | 1                                   |                                 |                           |
| Index of disparity, weighted         | 0.993 (<0.0001)  | 0.963 (<0.0001)                     | 1                               |                           |
| Black-to-white rate ratio            | 0.975 (<0.0001)  | 0.970 (<0.0001)                     | 0.974 (<0.0001)                 | 1                         |
| Population attributable proportion   | 0.998 (0.0020)   | 0.976 (0.1406)                      | 0.978 (0.0218)                  | 0.894 (0.0163)            |
| Panel D: 5-year changes in gonorrhea |                  |                                     |                                 |                           |
| Index of disparity, not weighted     | 0.937 (<0.0001)  | 1                                   |                                 |                           |
| Index of disparity, weighted         | 0.995 (<0.0001)  | 0.960 (<0.0001)                     | 1                               |                           |
| Black-to-white rate ratio            | 0.983 (<0.0001)  | 0.975 (<0.0001)                     | 0.991 (<0.0001)                 | 1                         |
| Population attributable proportion   | 0.910 (<0.0001)  | 0.833 (0.0002)                      | 0.895 (<0.0001)                 | 0.911 (<0.0001)           |

**Appendix Table B, Part 3: Analysis limited to changes of at least  $\pm 5\%$** 

| Disparity measure                    | Gini coefficient | Index of disparity,<br>not weighted | Index of disparity,<br>weighted | Black-to-white rate ratio |
|--------------------------------------|------------------|-------------------------------------|---------------------------------|---------------------------|
| Panel A: Annual changes in syphilis  |                  |                                     |                                 |                           |
| Index of disparity, not weighted     | 0.970 (<0.0001)  | 1                                   |                                 |                           |
| Index of disparity, weighted         | 0.996 (<0.0001)  | 0.969 (<0.0001)                     | 1                               |                           |
| Black-to-white rate ratio            | 0.926 (<0.0001)  | 0.894 (<0.0001)                     | 0.925 (<0.0001)                 | 1                         |
| Population attributable proportion   | 0.809 (0.0025)   | 0.841 (0.009)                       | 0.804 (0.0050)                  | 0.686 (0.0199)            |
| Panel B: 5-year changes in syphilis  |                  |                                     |                                 |                           |
| Index of disparity, not weighted     | 0.991 (<0.0001)  | 1                                   |                                 |                           |
| Index of disparity, weighted         | 0.997 (<0.0001)  | 0.993 (<0.0001)                     | 1                               |                           |
| Black-to-white rate ratio            | 0.866 (<0.0001)  | 0.866 (<0.0001)                     | 0.865 (<0.0001)                 | 1                         |
| Population attributable proportion   | 0.972 (<0.0001)  | 0.960 (<0.0001)                     | 0.960 (<0.0001)                 | 0.812 (<0.0001)           |
| Panel C: Annual changes in gonorrhea |                  |                                     |                                 |                           |
| Index of disparity, not weighted     | 0.940 (0.0596)   | 1                                   |                                 |                           |
| Index of disparity, weighted         | 0.998 (0.0001)   | 0.960 (0.0097)                      | 1                               |                           |
| Black-to-white rate ratio            | 0.975 (0.0002)   | 0.962 (0.0005)                      | 0.978 (0.0007)                  | 1                         |
| Population attributable proportion   | No observations  | No observations                     | No observations                 | -0.683 (0.5212)           |
| Panel D: 5-year changes in gonorrhea |                  |                                     |                                 |                           |
| Index of disparity, not weighted     | 0.931 (<0.0001)  | 1                                   |                                 |                           |
| Index of disparity, weighted         | 0.995 (<0.0001)  | 0.960 (<0.0001)                     | 1                               |                           |
| Black-to-white rate ratio            | 0.983 (<0.0001)  | 0.978 (<0.0001)                     | 0.991 (<0.0001)                 | 1                         |
| Population attributable proportion   | 0.994 (0.0058)   | 0.952 (0.0034)                      | 0.975 (0.0049)                  | 0.969 (0.0003)            |

**Appendix Table C: Part 1: Replication of Table 1 using 1997 rather than 1993 as the intermediate comparison year.**

**Syphilis and gonorrhea rates (reported cases per 100,000) by race/ethnicity and values of five measures of racial/ethnic disparities in syphilis and gonorrhea rates in the United States for three selected years: 1981, 1997, and 2013**

| Item estimated                      | Value of<br>measure in<br>1981 | Value of<br>measure in<br>1997 | Value of<br>measure in<br>2013 | Change in<br>measure (%),<br>1981 to 1997 | Change in<br>measure (%),<br>1997 to 2013 | Change in<br>measure (%),<br>1981 to 2013 |
|-------------------------------------|--------------------------------|--------------------------------|--------------------------------|-------------------------------------------|-------------------------------------------|-------------------------------------------|
| <b>Syphilis rates</b>               |                                |                                |                                |                                           |                                           |                                           |
| Non-Hispanic White                  | 4.9                            | 0.5                            | 2.9                            | -89.8%                                    | 480.0%                                    | -40.8%                                    |
| Non-Hispanic Black                  | 65.0                           | 20.5                           | 16.1                           | -68.5%                                    | -21.5%                                    | -75.2%                                    |
| Hispanic                            | 16.4                           | 1.5                            | 6.4                            | -90.9%                                    | 326.7%                                    | -61.0%                                    |
| Asian / Pacific Islander            | 2.2                            | 0.3                            | 2.5                            | -86.4%                                    | 733.3%                                    | 13.6%                                     |
| American Indian / Alaska Native     | 9.0                            | 1.9                            | 4.0                            | -78.9%                                    | 110.5%                                    | -55.6%                                    |
| <b>Syphilis disparity measures</b>  |                                |                                |                                |                                           |                                           |                                           |
| Gini coefficient                    | 0.546                          | 0.732                          | 0.356                          | 34.1%                                     | -51.4%                                    | -34.8%                                    |
| Index of disparity, not weighted    | 119.5                          | 166.8                          | 70.6                           | 39.6%                                     | -57.7%                                    | -40.9%                                    |
| Index of disparity, weighted        | 100.1                          | 140.1                          | 62.1                           | 39.9%                                     | -55.7%                                    | -38.0%                                    |
| Black-to-white rate ratio           | 13.3                           | 42.1                           | 5.5                            | 216.7%                                    | -86.9%                                    | -58.5%                                    |
| Population attributable proportion  | 0.831                          | 0.896                          | 0.528                          | 7.8%                                      | -41.1%                                    | -36.5%                                    |
| <b>Gonorrhea rates</b>              |                                |                                |                                |                                           |                                           |                                           |
| Non-Hispanic White                  | 155.4                          | 18.4                           | 32.4                           | -88.2%                                    | 76.1%                                     | -79.2%                                    |
| Non-Hispanic Black                  | 1,601.4                        | 579.5                          | 384.5                          | -63.8%                                    | -33.6%                                    | -76.0%                                    |
| Hispanic                            | 184.4                          | 45.8                           | 64.1                           | -75.2%                                    | 40.0%                                     | -65.2%                                    |
| Asian / Pacific Islander            | 38.6                           | 12.3                           | 17.9                           | -68.1%                                    | 45.5%                                     | -53.6%                                    |
| American Indian / Alaska Native     | 443.6                          | 71.4                           | 135.5                          | -83.9%                                    | 89.8%                                     | -69.5%                                    |
| <b>Gonorrhea disparity measures</b> |                                |                                |                                |                                           |                                           |                                           |
| Gini coefficient                    | 0.483                          | 0.694                          | 0.528                          | 43.6%                                     | -24.0%                                    | 9.2%                                      |
| Index of disparity, not weighted    | 120.4                          | 155.0                          | 117.3                          | 28.7%                                     | -24.3%                                    | -2.5%                                     |
| Index of disparity, weighted        | 93.2                           | 132.5                          | 94.3                           | 42.3%                                     | -28.8%                                    | 1.3%                                      |
| Black-to-white rate ratio           | 10.3                           | 31.4                           | 11.9                           | 204.8%                                    | -62.3%                                    | 15.0%                                     |
| Population attributable proportion  | 0.884                          | 0.865                          | 0.785                          | -2.2%                                     | -9.2%                                     | -11.2%                                    |

**Appendix Table C: Part 2: Replication of Table 1 using 1990 rather than 1993 as the intermediate comparison year.**

**Syphilis and gonorrhea rates (reported cases per 100,000) by race/ethnicity and values of five measures of racial/ethnic disparities in syphilis and gonorrhea rates in the United States for three selected years: 1981, 1990, and 2013**

| Item estimated                      | Value of<br>measure in<br>1981 | Value of<br>measure in<br>1990 | Value of<br>measure in<br>2013 | Change in<br>measure (%),<br>1981 to 1990 | Change in<br>measure (%),<br>1990 to 2013 | Change in<br>measure (%),<br>1981 to 2013 |
|-------------------------------------|--------------------------------|--------------------------------|--------------------------------|-------------------------------------------|-------------------------------------------|-------------------------------------------|
| <b>Syphilis rates</b>               |                                |                                |                                |                                           |                                           |                                           |
| Non-Hispanic White                  | 4.9                            | 2.6                            | 2.9                            | -46.9%                                    | 11.5%                                     | -40.8%                                    |
| Non-Hispanic Black                  | 65.0                           | 138.8                          | 16.1                           | 113.5%                                    | -88.4%                                    | -75.2%                                    |
| Hispanic                            | 16.4                           | 14.9                           | 6.4                            | -9.1%                                     | -57.0%                                    | -61.0%                                    |
| Asian / Pacific Islander            | 2.2                            | 1.6                            | 2.5                            | -27.3%                                    | 56.3%                                     | 13.6%                                     |
| American Indian / Alaska Native     | 9.0                            | 5.9                            | 4.0                            | -34.4%                                    | -32.2%                                    | -55.6%                                    |
| <b>Syphilis disparity measures</b>  |                                |                                |                                |                                           |                                           |                                           |
| Gini coefficient                    | 0.546                          | 0.758                          | 0.356                          | 39.0%                                     | -53.1%                                    | -34.8%                                    |
| Index of disparity, not weighted    | 119.5                          | 175.5                          | 70.6                           | 46.9%                                     | -59.8%                                    | -40.9%                                    |
| Index of disparity, weighted        | 100.1                          | 142.3                          | 62.1                           | 42.2%                                     | -56.4%                                    | -38.0%                                    |
| Black-to-white rate ratio           | 13.3                           | 54.4                           | 5.5                            | 308.7%                                    | -89.9%                                    | -58.5%                                    |
| Population attributable proportion  | 0.831                          | 0.921                          | 0.528                          | 10.9%                                     | -42.7%                                    | -36.5%                                    |
| <b>Gonorrhea rates</b>              |                                |                                |                                |                                           |                                           |                                           |
| Non-Hispanic White                  | 155.4                          | 42.0                           | 32.4                           | -73.0%                                    | -22.9%                                    | -79.2%                                    |
| Non-Hispanic Black                  | 1601.4                         | 1553.0                         | 384.5                          | -3.0%                                     | -75.2%                                    | -76.0%                                    |
| Hispanic                            | 184.4                          | 96.0                           | 64.1                           | -47.9%                                    | -33.2%                                    | -65.2%                                    |
| Asian / Pacific Islander            | 38.6                           | 19.8                           | 17.9                           | -48.7%                                    | -9.6%                                     | -53.6%                                    |
| American Indian / Alaska Native     | 443.6                          | 150.9                          | 135.5                          | -66.0%                                    | -10.2%                                    | -69.5%                                    |
| <b>Gonorrhea disparity measures</b> |                                |                                |                                |                                           |                                           |                                           |
| Gini coefficient                    | 0.483                          | 0.718                          | 0.528                          | 48.5%                                     | -26.5%                                    | 9.2%                                      |
| Index of disparity, not weighted    | 120.4                          | 170.5                          | 117.3                          | 41.6%                                     | -31.2%                                    | -2.5%                                     |
| Index of disparity, weighted        | 93.2                           | 139.1                          | 94.3                           | 49.3%                                     | -32.2%                                    | 1.3%                                      |
| Black-to-white rate ratio           | 10.3                           | 37.0                           | 11.9                           | 259.0%                                    | -68.0%                                    | 15.0%                                     |
| Population attributable proportion  | 0.884                          | 0.912                          | 0.785                          | 3.2%                                      | -13.9%                                    | -11.2%                                    |

**Appendix Table D, Part 1. Replication of Table 1 using STD rates among ages 15 to 39 years rather than all ages**

**Syphilis and gonorrhea rates (reported cases per 100,000) among ages 15 to 39 years by race/ethnicity and values of five measures of racial/ethnic disparities in syphilis and gonorrhea rates in the United States for three selected years: 1981, 1993, and 2013**

| Item estimated                      | Value of<br>measure in<br>1981 | Value of<br>measure in<br>1993 | Value of<br>measure in<br>2013 | Change in<br>measure (%),<br>1981 to 1993 | Change in<br>measure (%),<br>1993 to 2013 | Change in<br>measure (%),<br>1981 to 2013 |
|-------------------------------------|--------------------------------|--------------------------------|--------------------------------|-------------------------------------------|-------------------------------------------|-------------------------------------------|
| <b>Syphilis rates</b>               |                                |                                |                                |                                           |                                           |                                           |
| Non-Hispanic White                  | 9.9                            | 2.3                            | 5.2                            | -76.8%                                    | 126.1%                                    | -47.5%                                    |
| Non-Hispanic Black                  | 133.3                          | 141.2                          | 35.4                           | 5.9%                                      | -74.9%                                    | -73.4%                                    |
| Hispanic                            | 30.3                           | 8.7                            | 11.7                           | -71.3%                                    | 34.5%                                     | -61.4%                                    |
| Asian / Pacific Islander            | 3.7                            | 1.7                            | 4.7                            | -54.1%                                    | 176.5%                                    | 27.0%                                     |
| American Indian / Alaska Native     | 17.0                           | 3.8                            | 7.4                            | -77.6%                                    | 94.7%                                     | -56.5%                                    |
| <b>Syphilis disparity measures</b>  |                                |                                |                                |                                           |                                           |                                           |
| Gini coefficient                    | 0.556                          | 0.767                          | 0.408                          | 37.9%                                     | -46.8%                                    | -26.6%                                    |
| Index of disparity, not weighted    | 115.8                          | 178.4                          | 75.3                           | 54.0%                                     | -57.8%                                    | -35.0%                                    |
| Index of disparity, weighted        | 100.3                          | 147.9                          | 68.1                           | 47.5%                                     | -53.9%                                    | -32.1%                                    |
| Black-to-white rate ratio           | 13.5                           | 60.6                           | 6.9                            | 348.6%                                    | -88.7%                                    | -49.2%                                    |
| Population attributable proportion  | 0.868                          | 0.919                          | 0.565                          | 5.9%                                      | -38.5%                                    | -34.9%                                    |
| <b>Gonorrhea rates</b>              |                                |                                |                                |                                           |                                           |                                           |
| Non-Hispanic White                  | 361.6                          | 52.4                           | 90.6                           | -85.5%                                    | 72.9%                                     | -74.9%                                    |
| Non-Hispanic Black                  | 3403.3                         | 1896.8                         | 961.1                          | -44.3%                                    | -49.3%                                    | -71.8%                                    |
| Hispanic                            | 356.3                          | 124.5                          | 143.0                          | -65.1%                                    | 14.9%                                     | -59.9%                                    |
| Asian / Pacific Islander            | 73.2                           | 31.5                           | 40.3                           | -57.0%                                    | 27.9%                                     | -44.9%                                    |
| American Indian / Alaska Native     | 892.9                          | 186.6                          | 333.9                          | -79.1%                                    | 78.9%                                     | -62.6%                                    |
| <b>Gonorrhea disparity measures</b> |                                |                                |                                |                                           |                                           |                                           |
| Gini coefficient                    | 0.474                          | 0.715                          | 0.518                          | 50.9%                                     | -27.6%                                    | 9.2%                                      |
| Index of disparity, not weighted    | 113.4                          | 160.1                          | 111.1                          | 41.1%                                     | -30.6%                                    | -2.1%                                     |
| Index of disparity, weighted        | 91.9                           | 137.9                          | 94.3                           | 50.0%                                     | -31.6%                                    | 2.6%                                      |
| Black-to-white rate ratio           | 9.4                            | 36.2                           | 10.6                           | 285.0%                                    | -70.7%                                    | 12.8%                                     |
| Population attributable proportion  | 0.902                          | 0.895                          | 0.820                          | -0.8%                                     | -8.4%                                     | -9.1%                                     |

**Appendix Table D, Part 2. Replication of Table 2 using STD rates among ages 15 to 39 years rather than all ages**

**Correlation between changes in racial disparity measures, 1981 - 2013: Pearson correlation coefficient (p-value)**

| Disparity measure                    | Gini coefficient | Index of disparity,<br>not weighted | Index of disparity,<br>weighted | Black-to-white rate<br>ratio |
|--------------------------------------|------------------|-------------------------------------|---------------------------------|------------------------------|
| Panel A: Annual changes in syphilis  |                  |                                     |                                 |                              |
| Index of disparity, not weighted     | 0.934 (<0.0001)  | 1                                   |                                 |                              |
| Index of disparity, weighted         | 0.988 (<0.0001)  | 0.943 (<0.0001)                     | 1                               |                              |
| Black-to-white rate ratio            | 0.907 (<0.0001)  | 0.869 (<0.0001)                     | 0.902 (<0.0001)                 | 1                            |
| Population attributable proportion   | 0.604 (0.0003)   | 0.530 (0.0018)                      | 0.552 (0.0011)                  | 0.505 (0.0032)               |
| Panel B: 5-year changes in syphilis  |                  |                                     |                                 |                              |
| Index of disparity, not weighted     | 0.988 (<0.0001)  | 1                                   |                                 |                              |
| Index of disparity, weighted         | 0.996 (<0.0001)  | 0.992 (<0.0001)                     | 1                               |                              |
| Black-to-white rate ratio            | 0.857 (<0.0001)  | 0.870 (<0.0001)                     | 0.842 (<0.0001)                 | 1                            |
| Population attributable proportion   | 0.958 (<0.0001)  | 0.928 (<0.0001)                     | 0.956 (<0.0001)                 | 0.768 (<0.0001)              |
| Panel C: Annual changes in gonorrhea |                  |                                     |                                 |                              |
| Index of disparity, not weighted     | 0.881 (<0.0001)  | 1                                   |                                 |                              |
| Index of disparity, weighted         | 0.993 (<0.0001)  | 0.910 (<0.0001)                     | 1                               |                              |
| Black-to-white rate ratio            | 0.957 (<0.0001)  | 0.902 (<0.0001)                     | 0.968 (<0.0001)                 | 1                            |
| Population attributable proportion   | 0.532 (0.0017)   | 0.480 (0.0054)                      | 0.508 (0.0030)                  | 0.393 (0.0262)               |
| Panel D: 5-year changes in gonorrhea |                  |                                     |                                 |                              |
| Index of disparity, not weighted     | 0.964 (<0.0001)  | 1                                   |                                 |                              |
| Index of disparity, weighted         | 0.998 (<0.0001)  | 0.976 (<0.0001)                     | 1                               |                              |
| Black-to-white rate ratio            | 0.985 (<0.0001)  | 0.982 (<0.0001)                     | 0.989 (<0.0001)                 | 1                            |
| Population attributable proportion   | 0.675 (<0.0001)  | 0.687 (<0.0001)                     | 0.679 (<0.0001)                 | 0.687 (<0.0001)              |

**Appendix Table E. Replication of Table 2, with data from 1981 to 1985 excluded**

**Correlation between changes in racial disparity measures, 1981 - 2013: Pearson correlation coefficient (p-value)**

| Disparity measure                    | Gini coefficient | Index of disparity,<br>not weighted | Index of disparity,<br>weighted | Black-to-white rate<br>ratio |
|--------------------------------------|------------------|-------------------------------------|---------------------------------|------------------------------|
| Panel A: Annual changes in syphilis  |                  |                                     |                                 |                              |
| Index of disparity, not weighted     | 0.930 (<0.0001)  | 1                                   |                                 |                              |
| Index of disparity, weighted         | 0.990 (<0.0001)  | 0.933 (<0.0001)                     | 1                               |                              |
| Black-to-white rate ratio            | 0.885 (<0.0001)  | 0.845 (<0.0001)                     | 0.889 (<0.0001)                 | 1                            |
| Population attributable proportion   | 0.735 (<0.0001)  | 0.665 (0.0002)                      | 0.694 (<0.0001)                 | 0.607 (0.0008)               |
| Panel B: 5-year changes in syphilis  |                  |                                     |                                 |                              |
| Index of disparity, not weighted     | 0.983 (<0.0001)  | 1                                   |                                 |                              |
| Index of disparity, weighted         | 0.994 (<0.0001)  | 0.986 (<0.0001)                     | 1                               |                              |
| Black-to-white rate ratio            | 0.828 (<0.0001)  | 0.855 (<0.0001)                     | 0.840 (<0.0001)                 | 1                            |
| Population attributable proportion   | 0.964 (<0.0001)  | 0.926 (<0.0001)                     | 0.945 (<0.0001)                 | 0.741 (<0.0001)              |
| Panel C: Annual changes in gonorrhea |                  |                                     |                                 |                              |
| Index of disparity, not weighted     | 0.885 (<0.0001)  | 1                                   |                                 |                              |
| Index of disparity, weighted         | 0.993 (<0.0001)  | 0.906 (<0.0001)                     | 1                               |                              |
| Black-to-white rate ratio            | 0.972 (<0.0001)  | 0.914 (<0.0001)                     | 0.967 (<0.0001)                 | 1                            |
| Population attributable proportion   | 0.376 (0.0532)   | 0.374 (0.0543)                      | 0.359 (0.066)                   | 0.280 (0.1576)               |
| Panel D: 5-year changes in gonorrhea |                  |                                     |                                 |                              |
| Index of disparity, not weighted     | 0.946 (<0.0001)  | 1                                   |                                 |                              |
| Index of disparity, weighted         | 0.999 (<0.0001)  | 0.946 (<0.0001)                     | 1                               |                              |
| Black-to-white rate ratio            | 0.967 (<0.0001)  | 0.975 (<0.0001)                     | 0.969 (<0.0001)                 | 1                            |
| Population attributable proportion   | 0.361 (0.0907)   | 0.415 (0.0491)                      | 0.361 (0.0909)                  | 0.307 (0.1537)               |
